# Supplementary material for: Alkaloid Derivative (Z)-3β-Ethylamino-Pregn-17(20)-en Inhibits Triple-Negative Breast Cancer Metastasis and Angiogenesis by Targeting HSP90α
Source: MDPI journal article supplement (doi:10.3390/molecules27207132), 2022-10-21
Supplement: s1 [file s1]

## Supplementary Materials

### **Alkaloid Derivative (Z)-3 $\beta$ -Ethylamino-pregn-17(20)-en Inhibits Triple-Negative Breast Cancer Metastasis and Angiogenesis By Targeting HSP90 $\alpha$**

Xin-Yao Liu<sup>1,†</sup>, Yu-Miao Wang<sup>1,†</sup>, Xiang-Yu Zhang<sup>1</sup>, Mei-Qi jia<sup>1</sup>, Hong-Quan Duan<sup>1,2,3</sup>,  
Nan Qin<sup>1</sup>, Ying Chen<sup>1</sup>, Yang Yu<sup>1\*</sup>, Xiao-Chuan Duan<sup>1,4\*</sup>

<sup>1</sup> School of Pharmacy, Tianjin Medical University, Tianjin 300070, China

<sup>2</sup> Research Center of Basic Medical Sciences, Tianjin Medical University, Tianjin 300070, China

<sup>3</sup> Key Laboratory of Immune Microenvironment and Disease (Ministry of Education), Tianjin Medical University, Tianjin 300070, China

<sup>4</sup> School of Biomedical Engineering and Technology, Tianjin Medical University, Tianjin 300070, China

\* Correspondence: duanxc@tmu.edu.cn (X.-C.D.); yuyang@tmu.edu.cn (Y.Y.); Tel.: 86-22-83336680 (X.-C.D.); Fax: 86-22-83336560 (X.-C.D.)

<sup>†</sup> These authors contributed equally to this work.

(A)

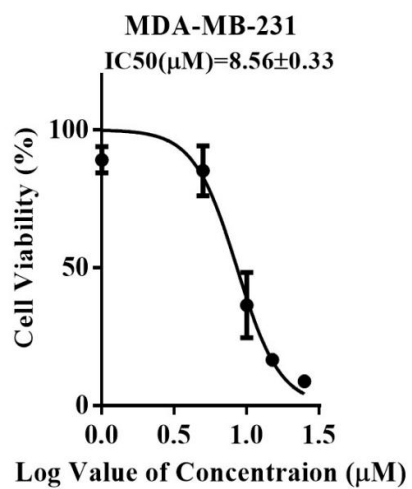

(B)

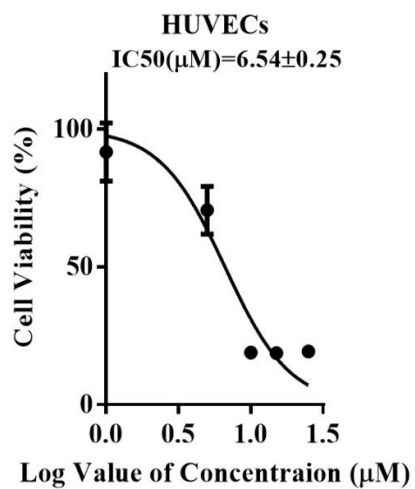

**Figure S1.** The cytotoxicity of compound **1** on MDA-MB-231 cells (A) and HUVECs (B).

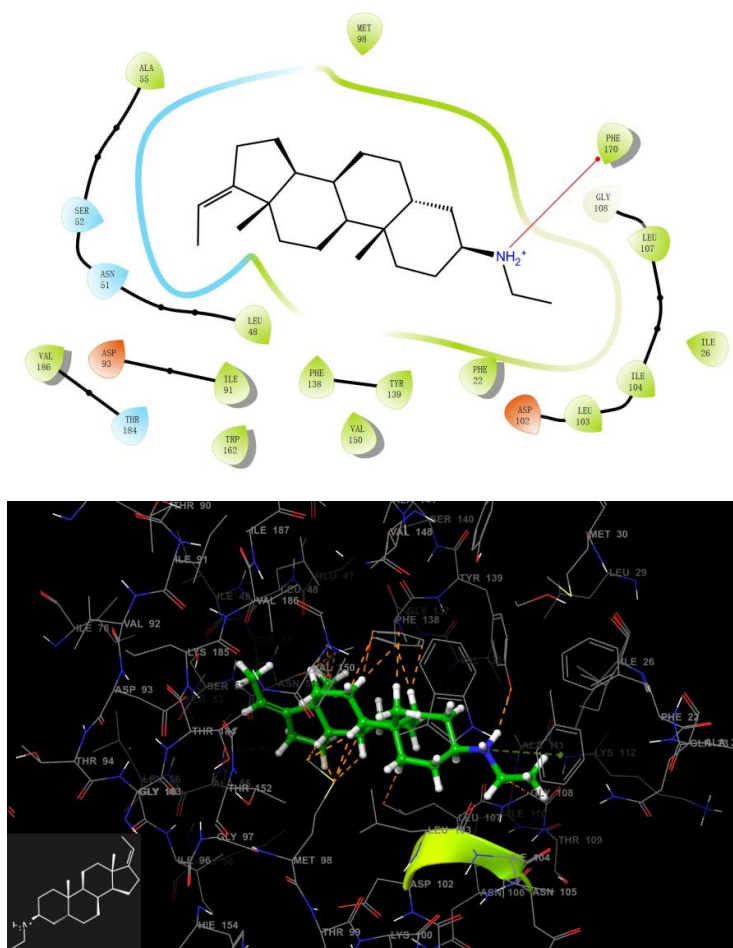

**Figure S2.** Detailed interaction model of compound **1** and HSP90 $\alpha$  in the best docking pose.

**Table S1.** Inhibitory effects of derivatives on the migration of MDA-MB-231 cells induced by chemokine EGF. (23f represents compound **1**)

| No.                   | IC <sub>50</sub> <sup>a</sup><br>(μM) | No.            | IC <sub>50</sub> <sup>a</sup><br>(μM) | No.        | IC <sub>50</sub> <sup>a</sup><br>(μM) |
|-----------------------|---------------------------------------|----------------|---------------------------------------|------------|---------------------------------------|
| <b>5</b>              | 0.09                                  | <b>22a</b>     | 7.37                                  | <b>24e</b> | >50                                   |
| <b>6</b>              | 2.21                                  | <b>22b</b>     | >50                                   | <b>24f</b> | 20.15                                 |
| <b>11</b>             | Tox <sup>c</sup>                      | <b>22c</b>     | 0.03                                  | <b>25a</b> | Tox <sup>c</sup>                      |
| <b>12</b>             | 1.08                                  | <b>22d</b>     | 2.34                                  | <b>25b</b> | Tox <sup>c</sup>                      |
| <b>17a</b>            | 0.48                                  | <b>23a</b>     | 5.51                                  | <b>25c</b> | 21.39                                 |
| <b>17b</b>            | 18.93                                 | <b>23b</b>     | 4.36                                  | <b>25d</b> | 15.92                                 |
| <b>17c</b>            | 28.54                                 | <b>23c</b>     | >50                                   | <b>25e</b> | 4.77                                  |
| <b>18a</b>            | 0.30                                  | <b>23d</b>     | 26.74                                 | <b>25f</b> | Tox <sup>c</sup>                      |
| <b>18b</b>            | Tox <sup>c</sup>                      | <b>23e</b>     | 1.21                                  | <b>26a</b> | >50                                   |
| <b>18c</b>            | Tox <sup>c</sup>                      | <b>23f (1)</b> | 0.17                                  | <b>26b</b> | 0.26                                  |
| <b>21a</b>            | 2.14                                  | <b>24a</b>     | 7.45                                  | <b>26c</b> | 0.85                                  |
| <b>21b</b>            | Tox <sup>c</sup>                      | <b>24b</b>     | 24.23                                 | <b>26d</b> | Tox <sup>c</sup>                      |
| <b>21c</b>            | >50                                   | <b>24c</b>     | 2.48                                  | <b>26e</b> | Tox <sup>c</sup>                      |
| <b>21d</b>            | 0.84                                  | <b>24d</b>     | >50                                   | <b>26f</b> | 32.84                                 |
| LY294002 <sup>b</sup> | 0.38                                  |                |                                       |            |                                       |

<sup>a</sup> IC<sub>50</sub> represents the concentration of the compound producing 50% inhibition against human MDA-MB-231 breast cancer cells.

<sup>b</sup> positive control

<sup>c</sup> Tox represents cytotoxicity in the test concentration.
